# Supplementary material
Source: Springer Nature journal article supplement (https://www.springermedizin.de/resource/supplementary/12936_2010_1372_MOESM1_ESM.pdf/9549634)
Supplement: MOESM1 [file 9549634]

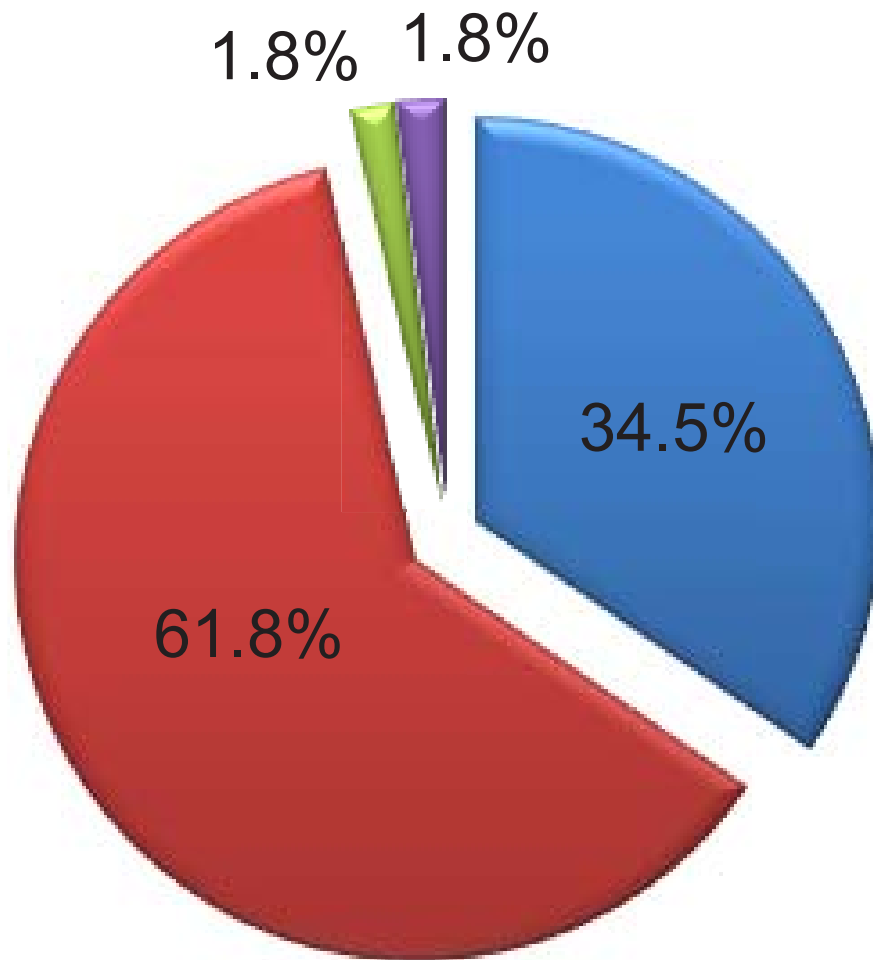

- Recent immigrants
- Visiting Relatives and Friends
- Tourists who travel outside Spain
- Tourists travel to Spain
